# Supplementary material for: The globular heads of the C1q receptor regulate apoptosis in human cervical squamous carcinoma cells via a p53-dependent pathway
Source: PubMed Central journal article supplement (PMC3567992; doi:10.1186/1479-5876-10-255), 2012-12-26

Supplementary Fig. 1

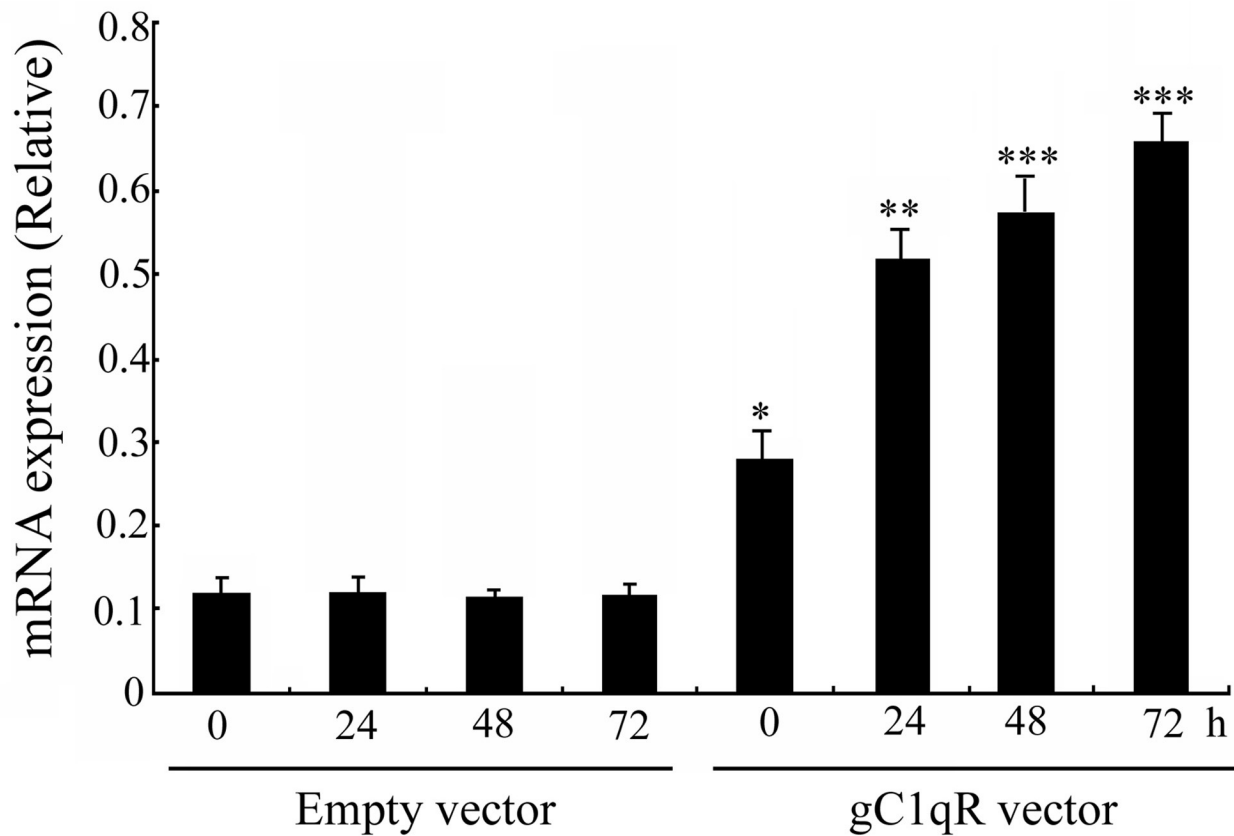

Supplement: 1479-5876-10-255-S1.pdf [file 1479-5876-10-255-S1.pdf]
