# Supplementary material for: The globular heads of the C1q receptor regulate apoptosis in human cervical squamous carcinoma cells via a p53-dependent pathway
Source: PubMed Central journal article supplement (PMC3567992; doi:10.1186/1479-5876-10-255), 2012-12-26

# Supplementary Fig. 2

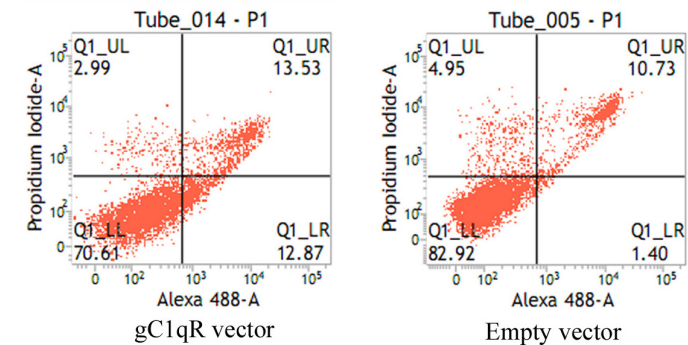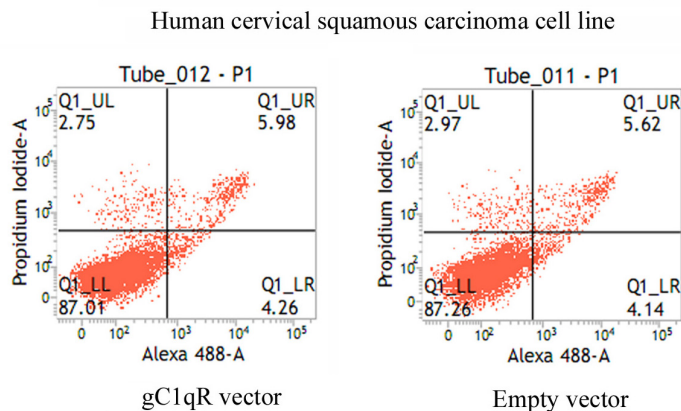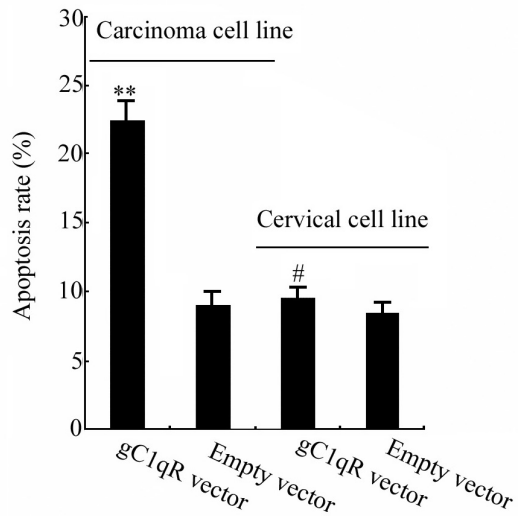

Supplement: 1479-5876-10-255-S2.pdf [file 1479-5876-10-255-S2.pdf]
